# Supplementary material
Source: MDPI journal article supplement (https://www.mdpi.com/2073-4433/9/7/261)
Supplement: s1 [file s1]

Table S1 Calculation bases of greenhouse gas emissions

|                                         | Reference            |
|-----------------------------------------|----------------------|
| <b>Grassland soil</b>                   |                      |
| NECB (Net ecosystem carbon balance)     | [4]                  |
| CH <sub>4</sub> emission                | [5]                  |
| N <sub>2</sub> O emission               | [5]                  |
| <b>Cattle waste management</b>          |                      |
| CO <sub>2</sub> emission                | [13, 14]             |
| CH <sub>4</sub> emission                | [1, 13, 16]          |
| N <sub>2</sub> O emission               | [1, 13, 16]          |
| <b>Synthetic fertilizer manufacture</b> |                      |
| CO <sub>2</sub> emission                | [16], SimaPro<br>7.1 |
| CH <sub>4</sub> emission                | [16], SimaPro<br>7.1 |
| N <sub>2</sub> O emissions              | [16], SimaPro<br>7.1 |
| <b>Grassland management</b>             |                      |
| CO <sub>2</sub> emission                | [14, 15]             |
